# Supplementary material
Source: MDPI journal article supplement (https://www.mdpi.com/2673-3293/2/2/21)
Supplement: s1 [file s1]

# Efficient electrocatalytic approach to spiro[furo[3,2-*b*]pyran-2,5'-pyrimidine scaffold as inhibitor of aldose reductase

Michail N. Elinson<sup>1, \*</sup>, Anatoly N. Vereshchagin<sup>1</sup>, Yuliya E. Ryzhkova<sup>1</sup>, Fedor V. Ryzhkov<sup>1</sup>, Artem N. Fakhrutdinov<sup>1</sup> and Mikhail P. Egorov<sup>1</sup>

N. D. Zelinsky Institute of Organic Chemistry, Russian Academy of Sciences, 690041 Moscow, Russia; anatoly103@yandex.ru (A.N.V.); julia4912@mail.ru (Y.E.R.); ryzhkov.fe@ya.ru (F.V.R.); fart@ioc.ac.ru (A.N.F.); mpe@ioc.ac.ru (M.P.E.)

\* Correspondence: elinson@ioc.ac.ru; Tel.: +7-499-137-28-42

## Supporting Information

### Table of Contents

|                                                                           |         |
|---------------------------------------------------------------------------|---------|
| <sup>1</sup> H and <sup>13</sup> C Spectra of Compounds <b>2a-i</b> ..... | S2-S10  |
| 2D NMR Spectra of Compound <b>2a</b> .....                                | S11     |
| Single-crystal X-ray Diffraction Data for Compound <b>2f</b> .....        | S13-S22 |

### 1. <sup>1</sup>H and <sup>13</sup>C Spectra of Compounds

5-(Hydroxymethyl)-1',3'-dimethyl-3-phenyl-2'H-spiro[furo[3,2-*b*]pyran-2,5'-pyrimidine]-2',4',6',7(1'H,3H,3'H)-tetraone **2a**

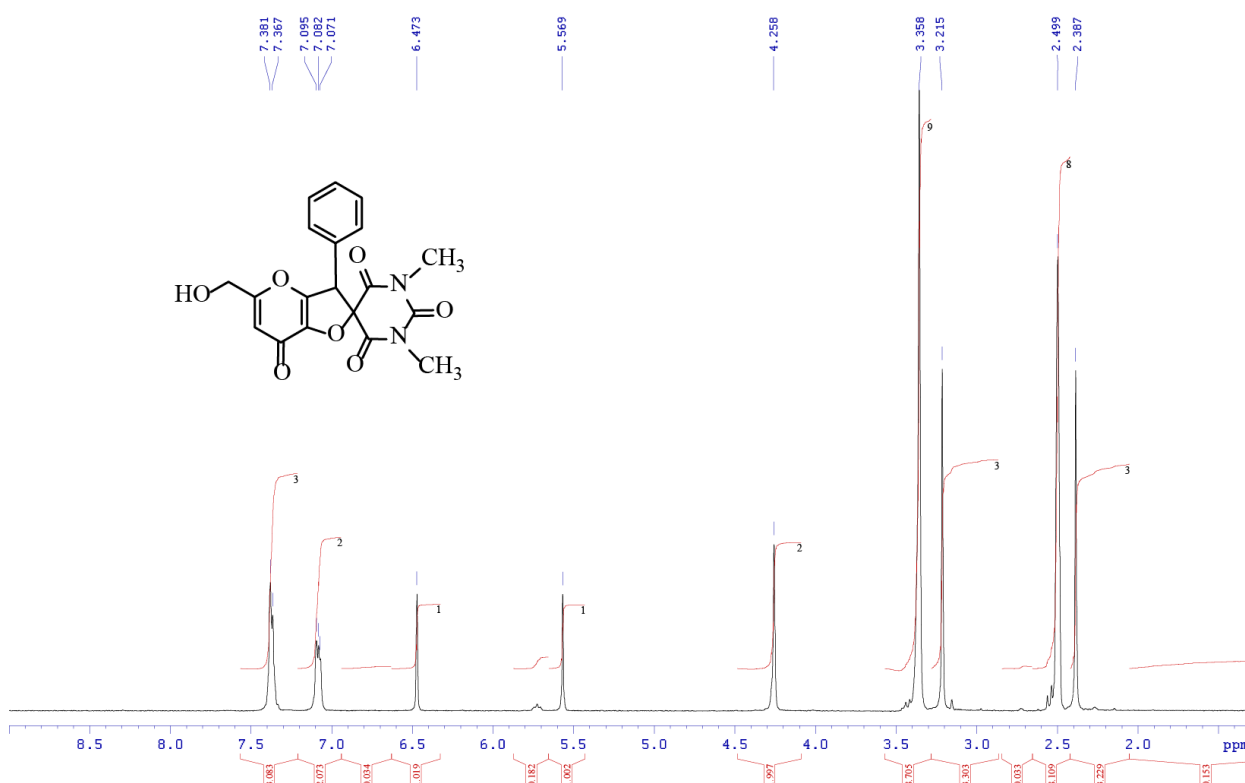

Figure S1. Compound **2a**.

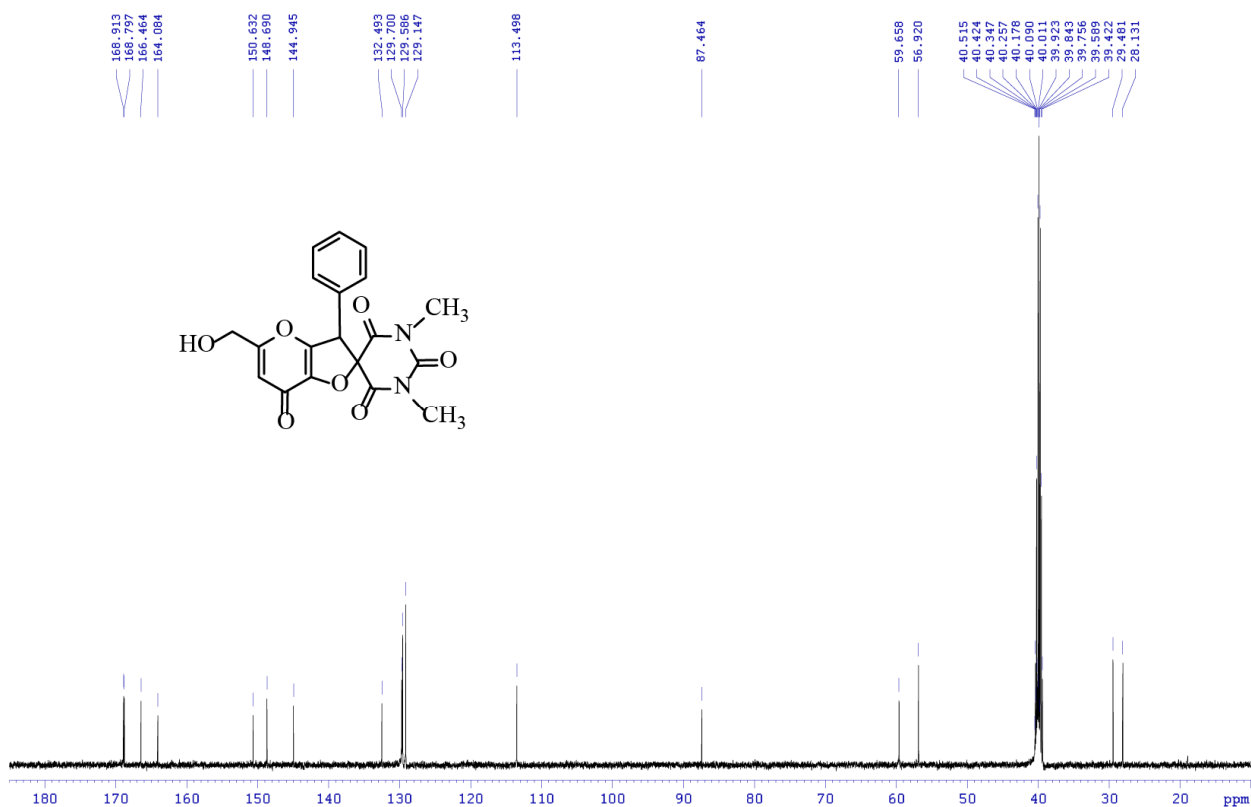

Figure S2. Compound 2a.

5-(Hydroxymethyl)-3-(2-hydroxyphenyl)-1',3'-dimethyl-2'H-spiro[furo[3,2-b]pyran-2,5'-pyrimidine]-2',4',6',7(1'H,3H,3'H)-tetraone 2b

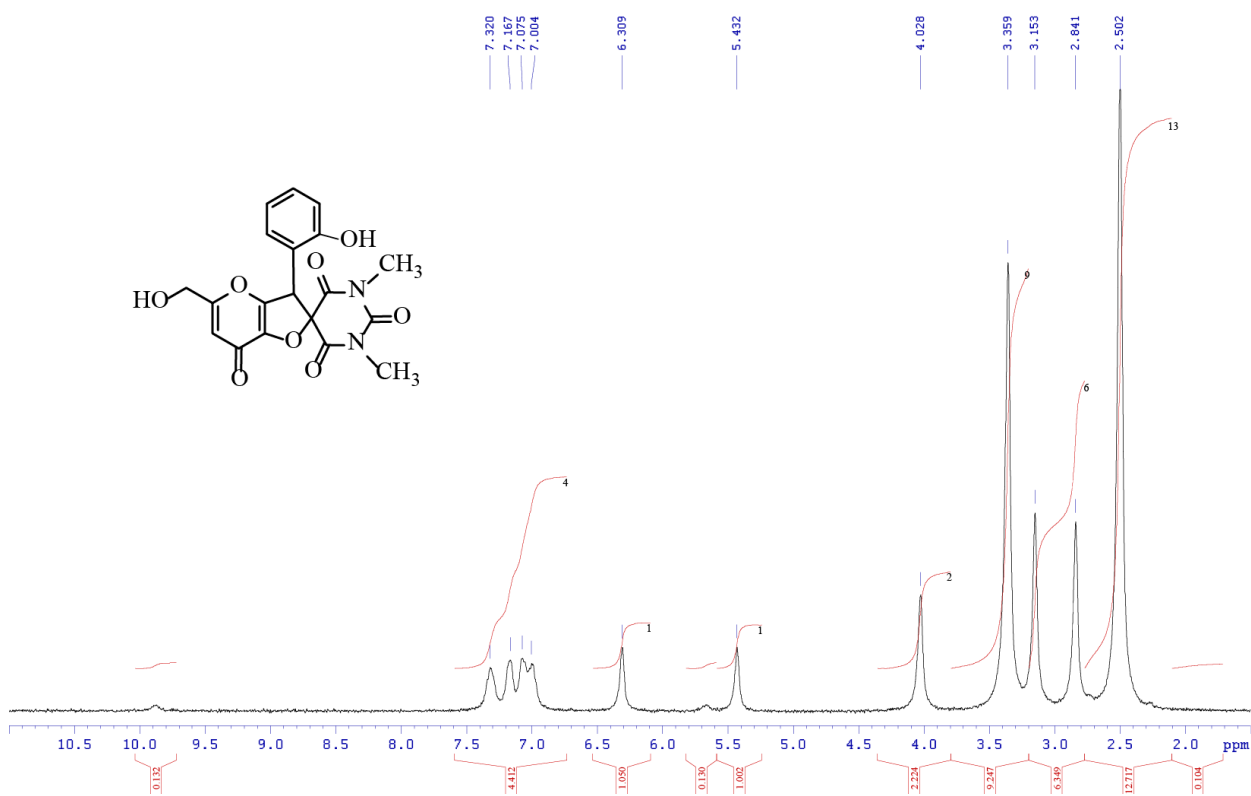

Figure S3. Compound 2b.

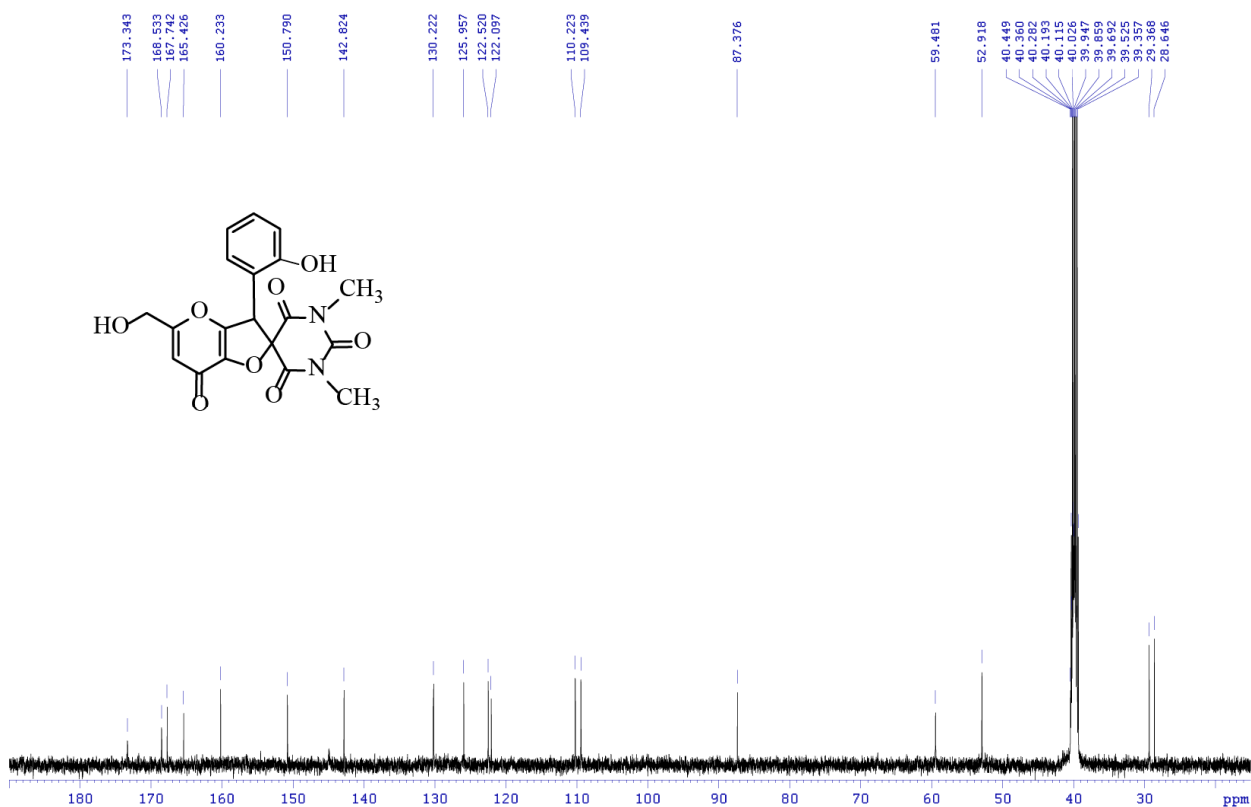

Figure S4. Compound 2b.

5-(Hydroxymethyl)-3-(4-methoxyphenyl)-1',3'-dimethyl-2'H-spiro[furo[3,2-b]pyran-2,5'-pyrimidine]-2',4',6',7(1'H,3H,3'H)-tetraone 2c

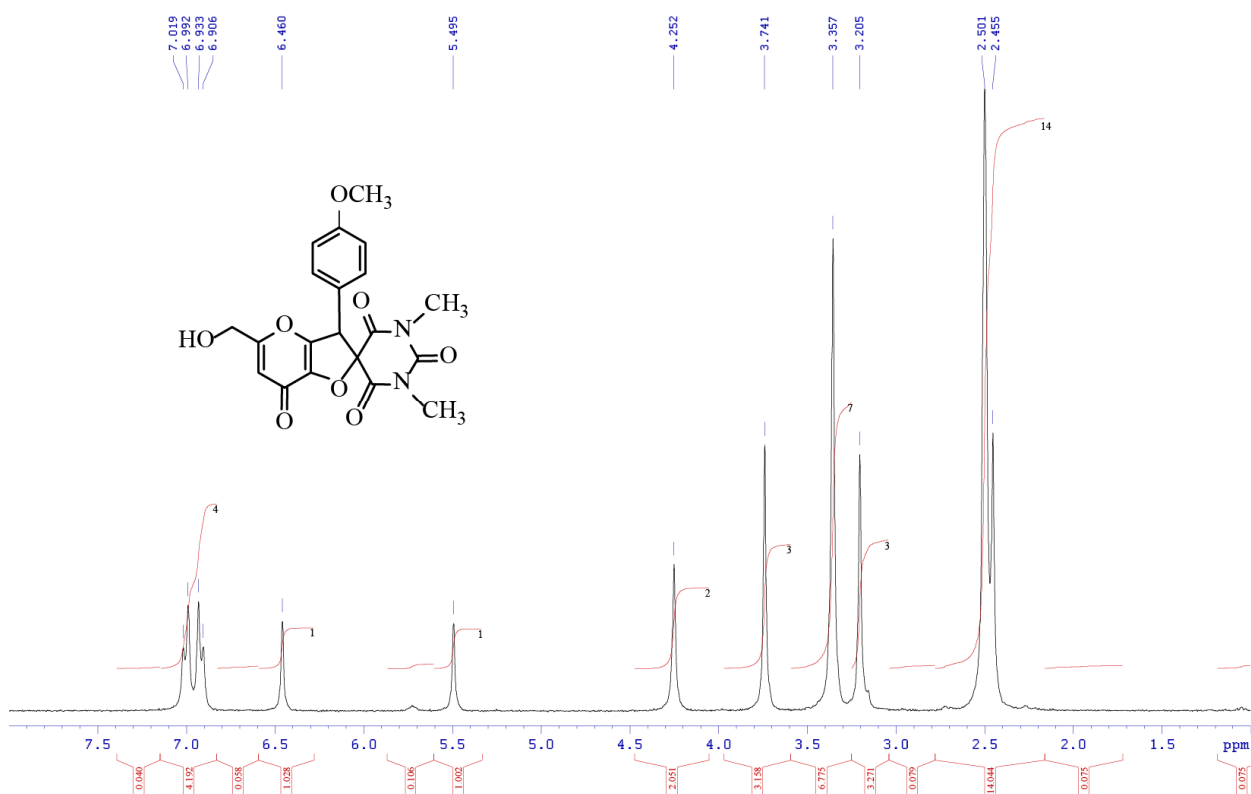

Figure S5. Compound 2c.

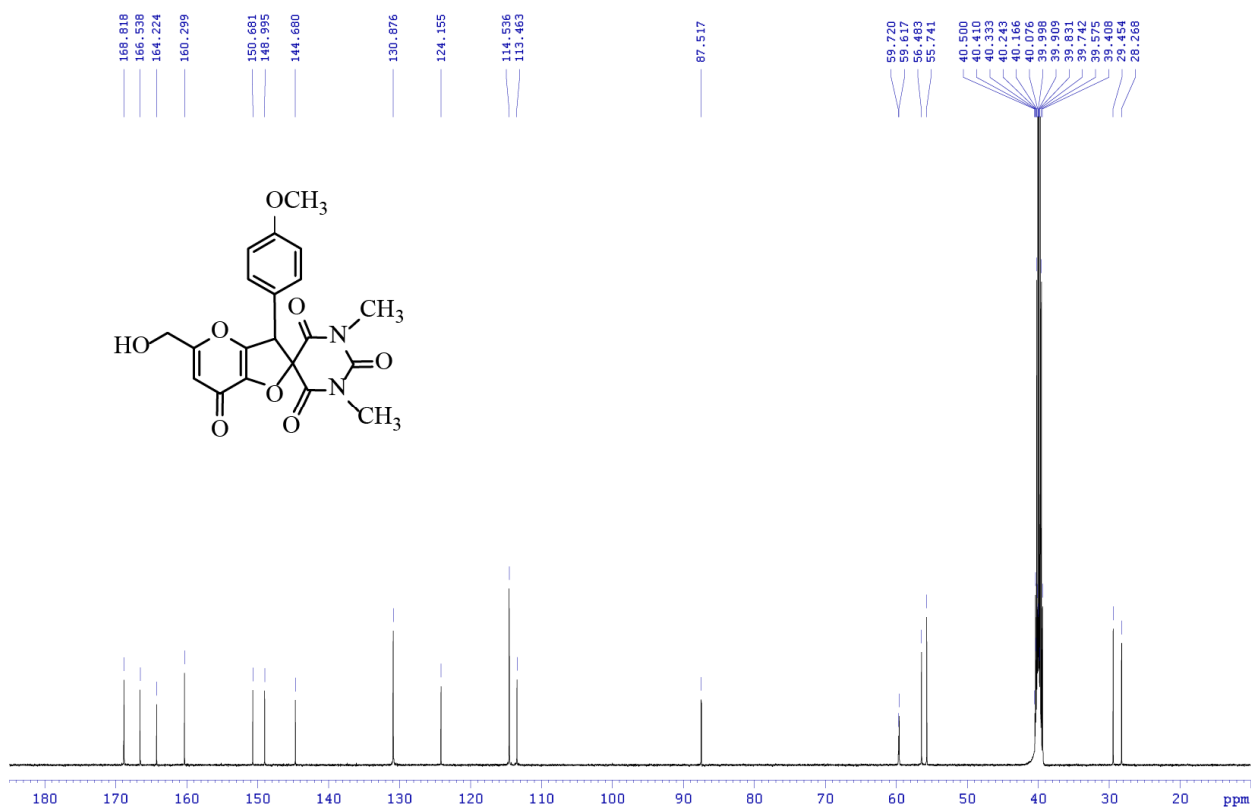

Figure S6. Compound 2c.

5-(Hydroxymethyl)-1',3'-dimethyl-3-(p-tolyl)-2'H-spiro[furo[3,2-b]pyran-2,5'-pyrimidine]-2',4',6',7(1'H,3H,3'H)-tetraone 2d

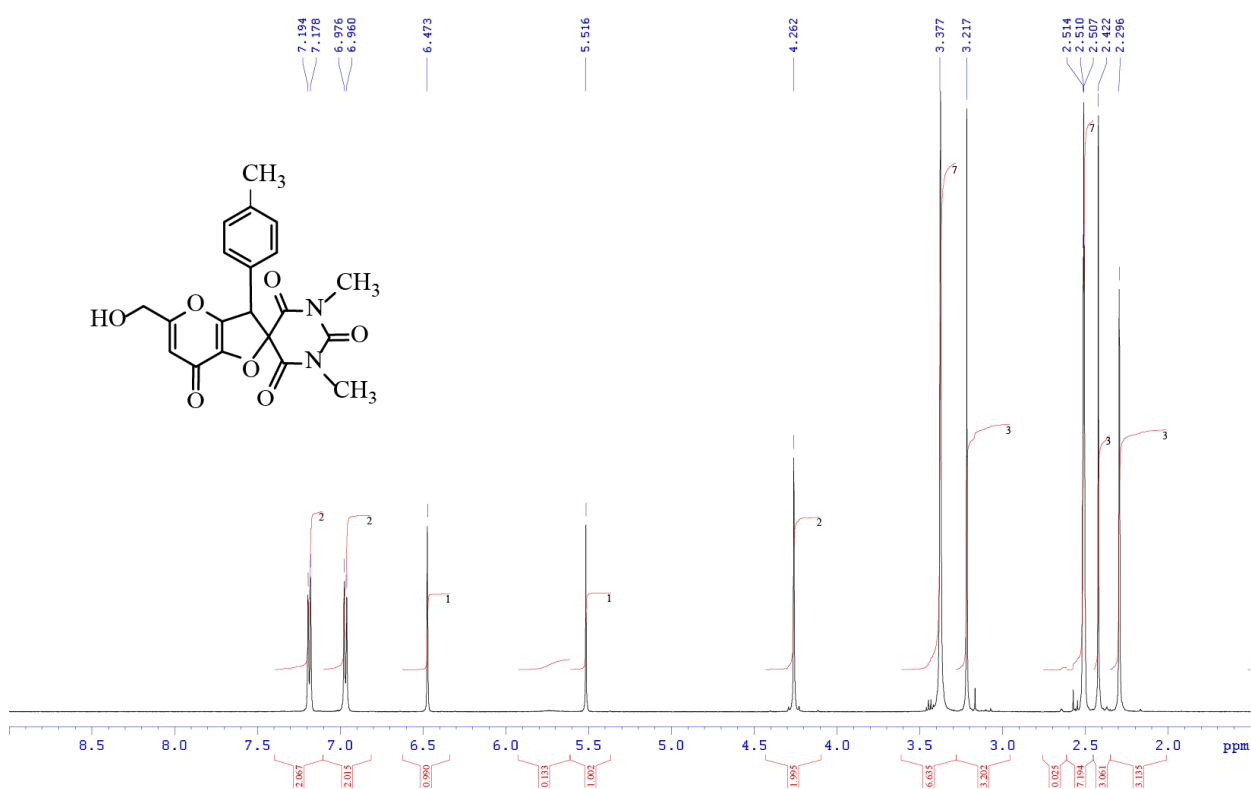

Figure S7. Compound 2d.

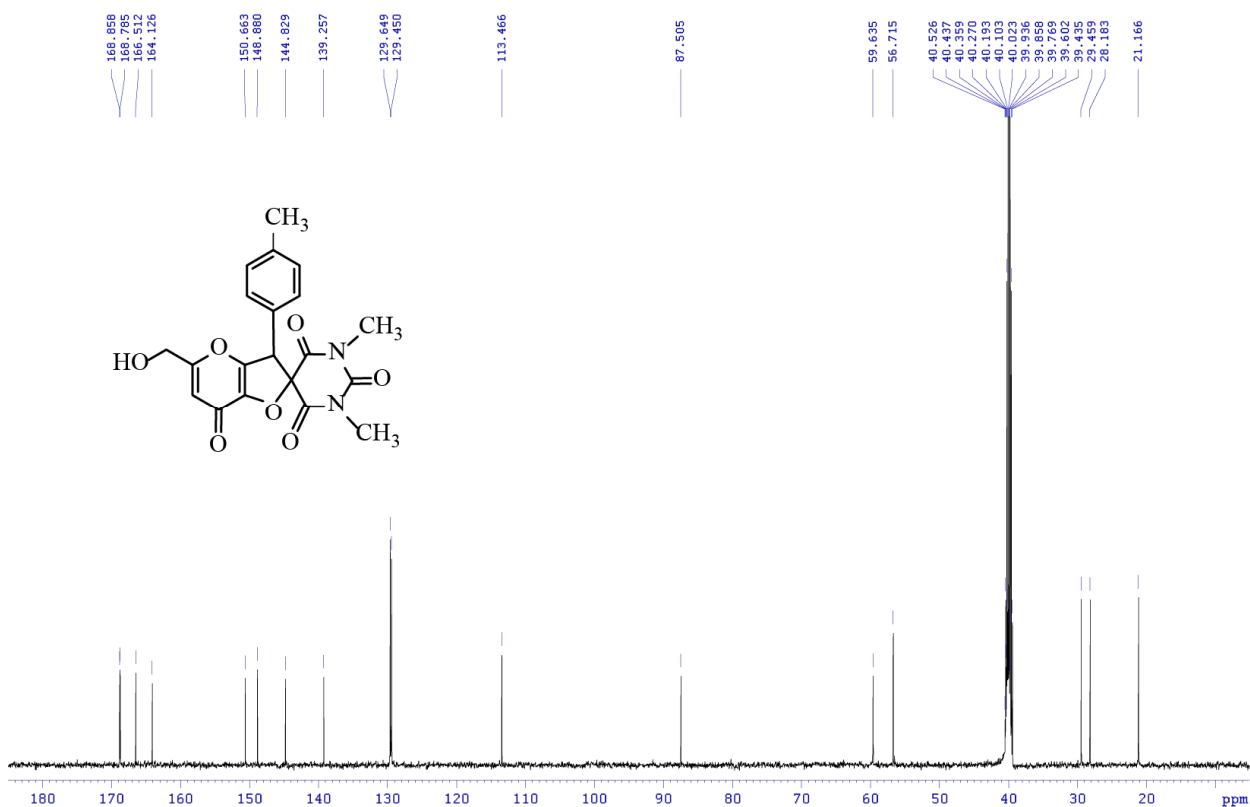

Figure S8. Compound 2d.

3-(4-Ethylphenyl)-5-(hydroxymethyl)-1',3'-dimethyl-2'H-spiro[furo[3,2-b]pyran-2,5'-pyrimidine]-2,4',6',7(1'H,3H,3'H)-tetraone 2e

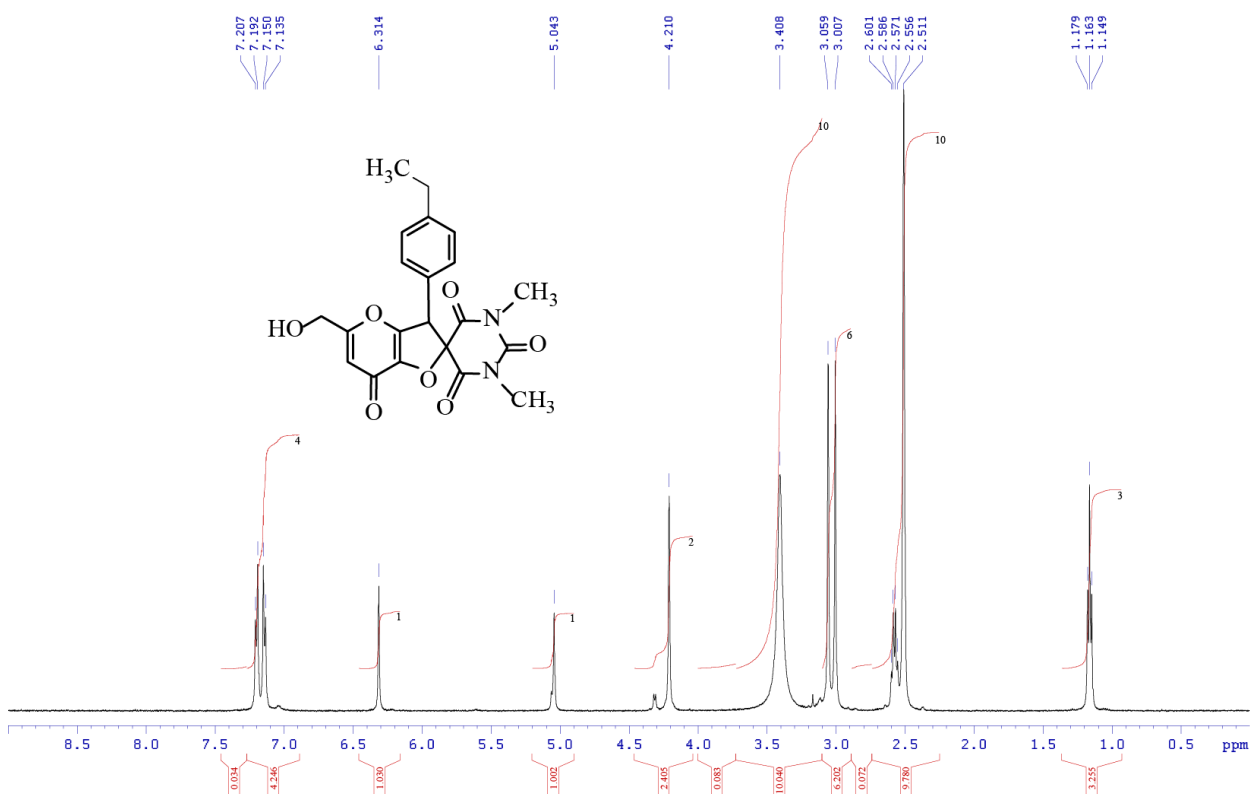

Figure S9. Compound 2e.

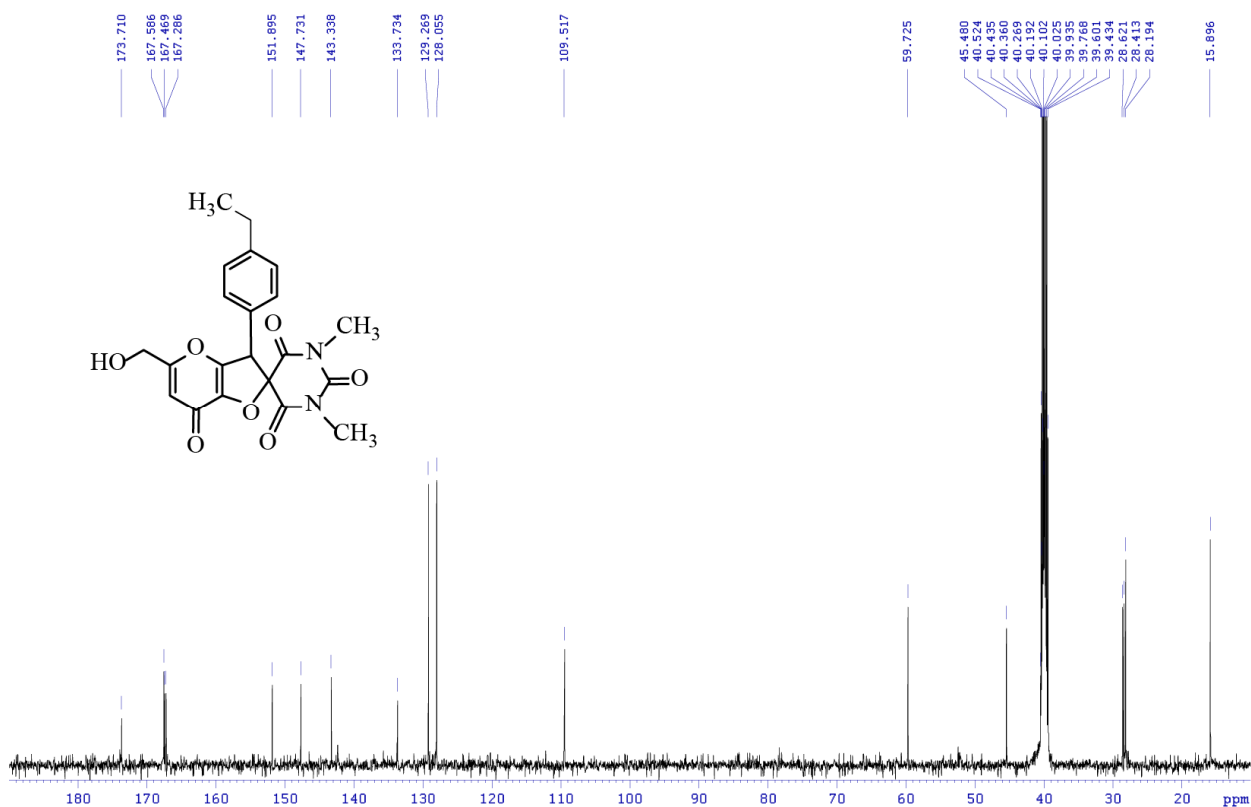

Figure S10. Compound 2e.

3-(4-Chlorophenyl)-5-(hydroxymethyl)-1',3'-dimethyl-2'H-spiro[furo[3,2-b]pyran-2,5'-pyrimidine]-2',4',6',7(1H,3H,3'H)-tetraone 2f

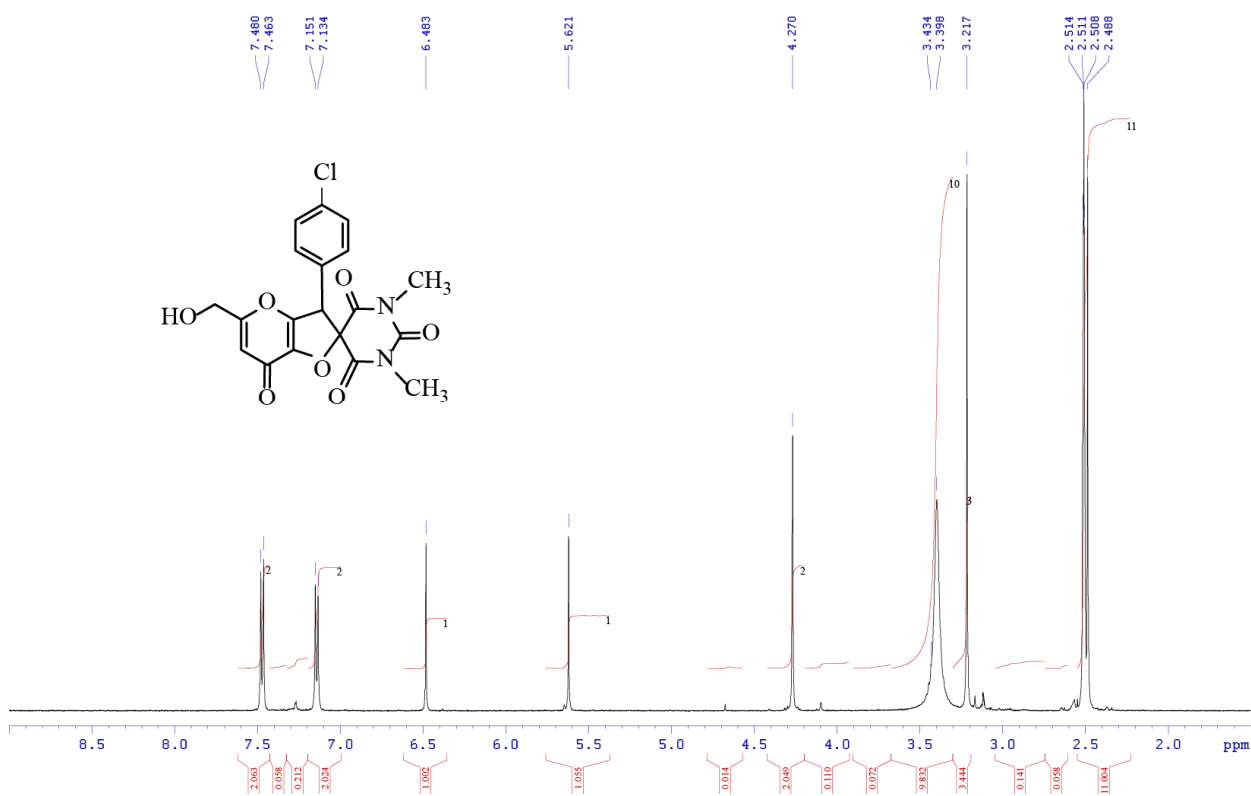

Figure S11. Compound 2f.

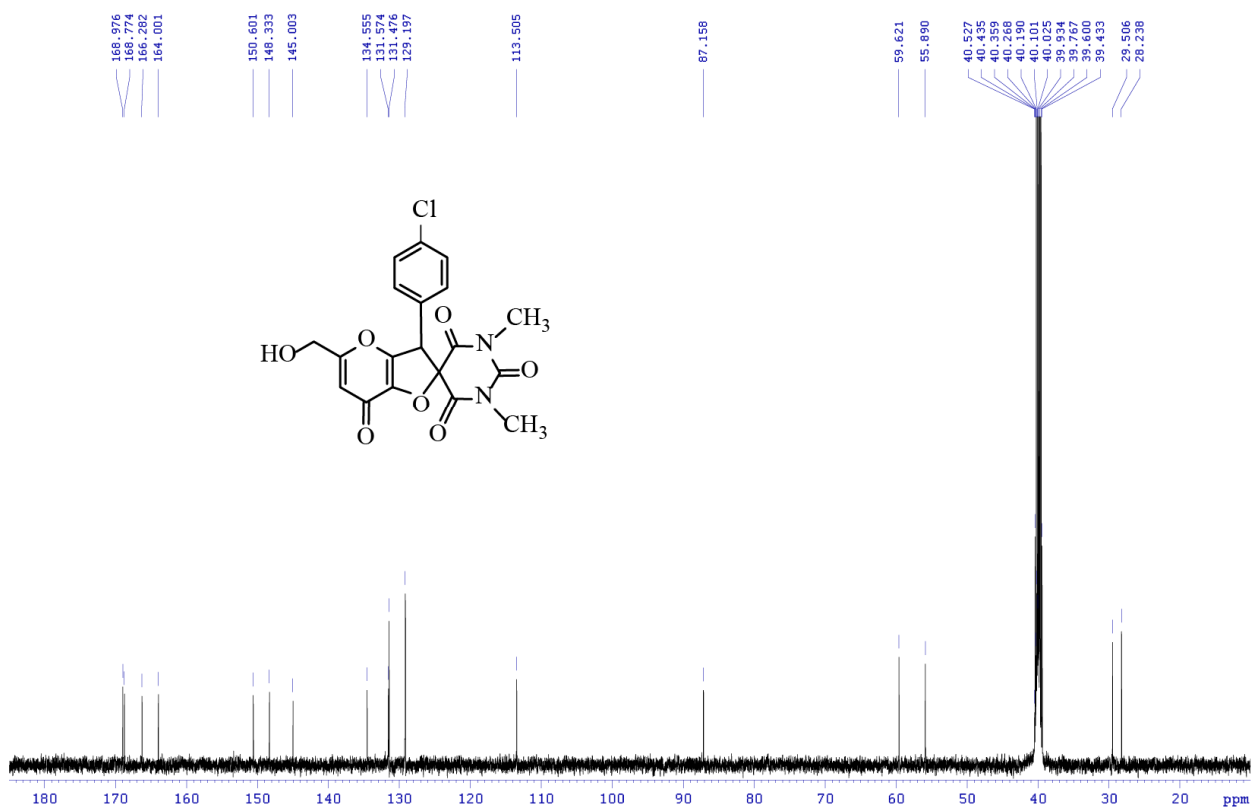

Figure S12. Compound 2f.

3-(3-Bromophenyl)-5-(hydroxymethyl)-1,3'-dimethyl-2'H-spiro[furo[3,2-b]pyran-2,5'-pyrimidine]-2',4',6',7(1'H,3H,3'H)-tetraone 2g

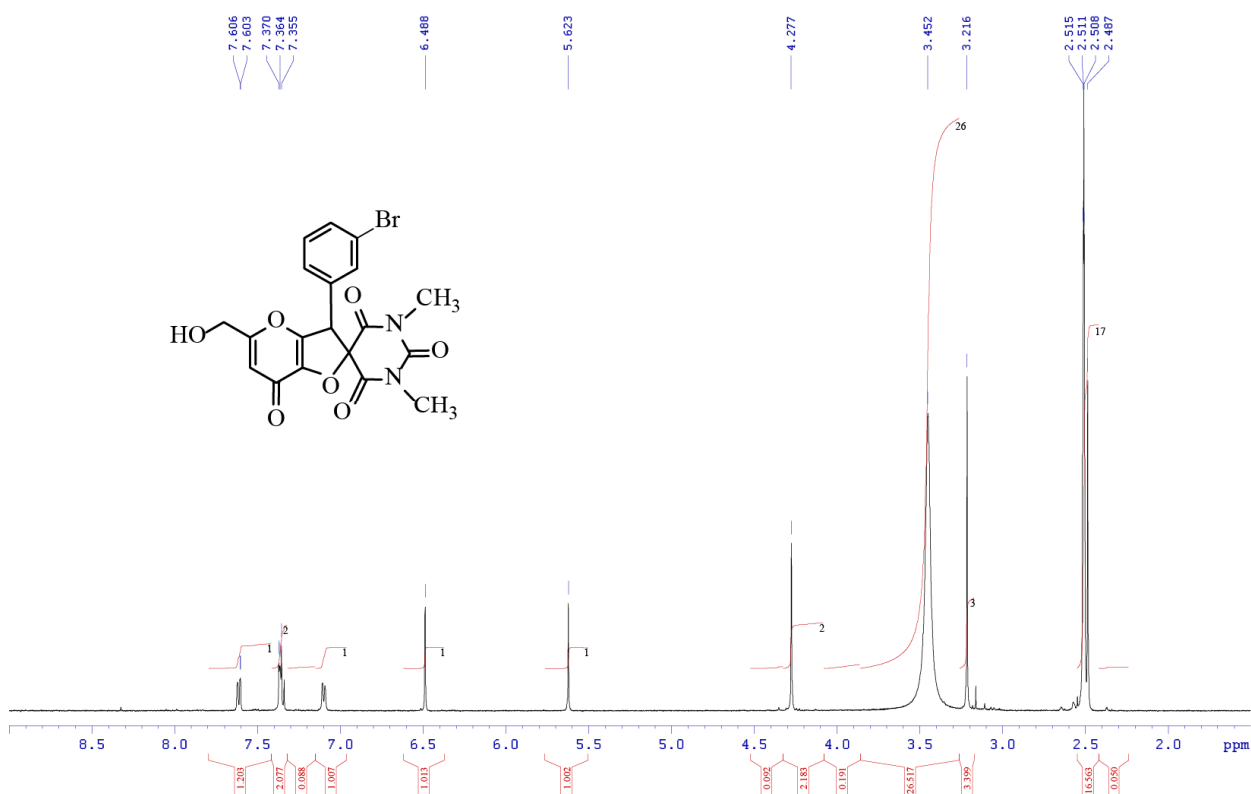

Figure S13. Compound 2g.

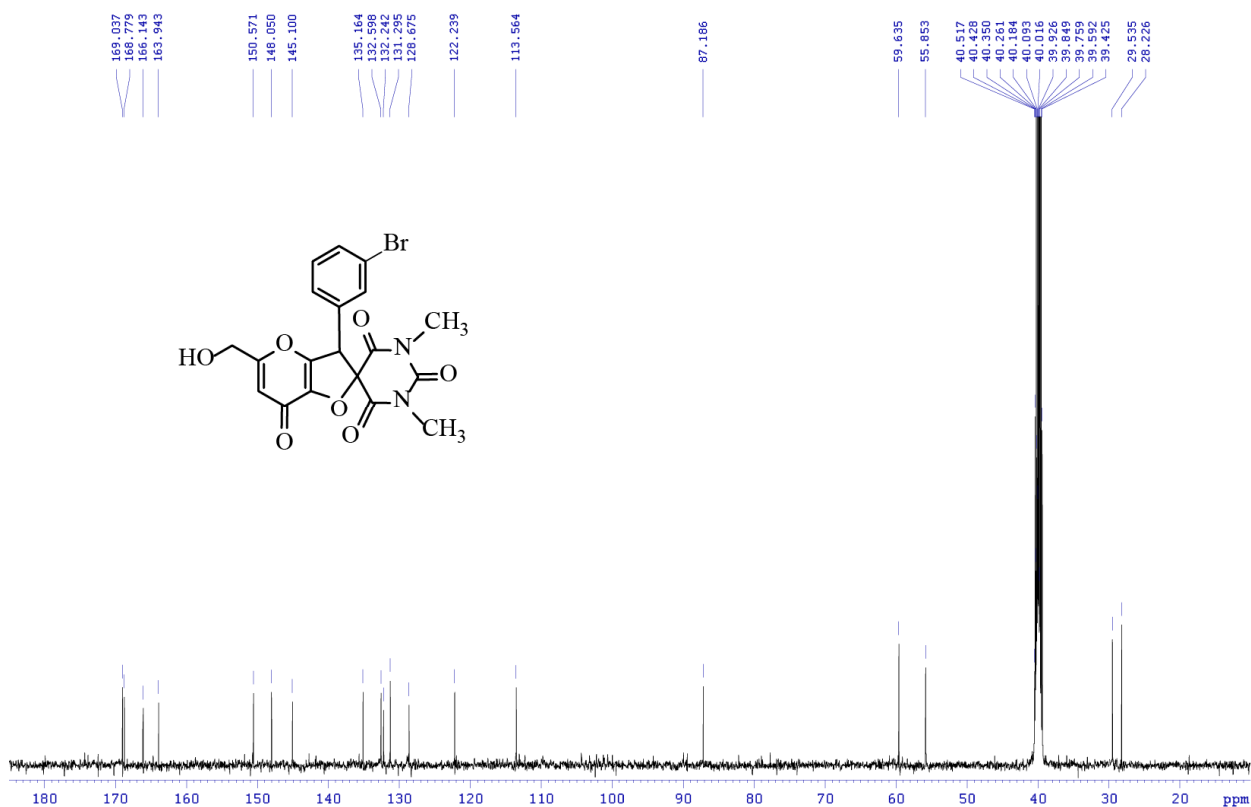

Figure S14. Compound 2g.

5-(Hydroxymethyl)-1',3'-dimethyl-3-(4-nitrophenyl)-2'H-spiro[furo[3,2-b]pyran-2,5'-pyrimidine]-2',4',6',7'(1'H,3H,3'H)-tetraone 2h

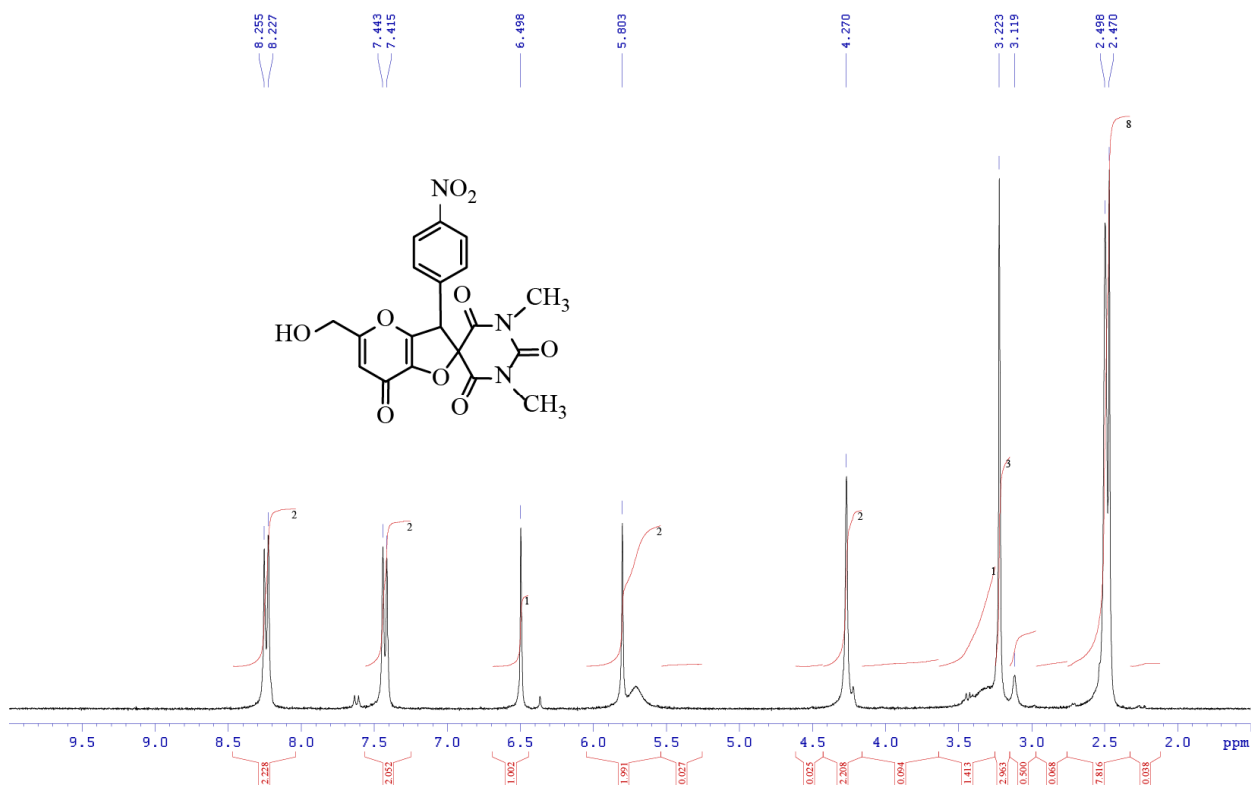

Figure S15. Compound 2h.



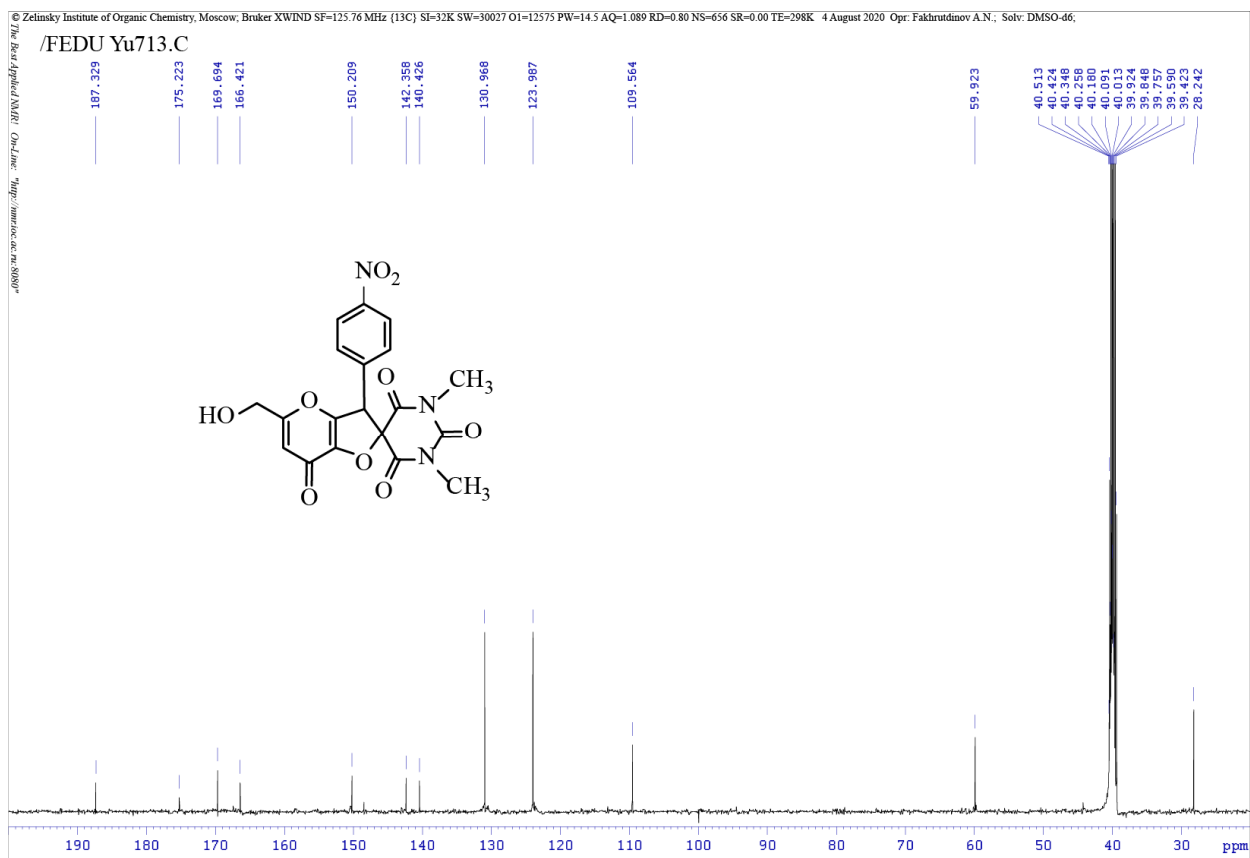

**Figure S16. Compound 2h.**

Methyl 4-(5-(hydroxymethyl)-1',3'-dimethyl-2',4',6',7-tetraoxo-1',3,3',4',6',7-hexahydro-2'H-spiro[furo[3,2-b]pyran-2,5'-pyrimidin]-3-yl)benzoate 2i

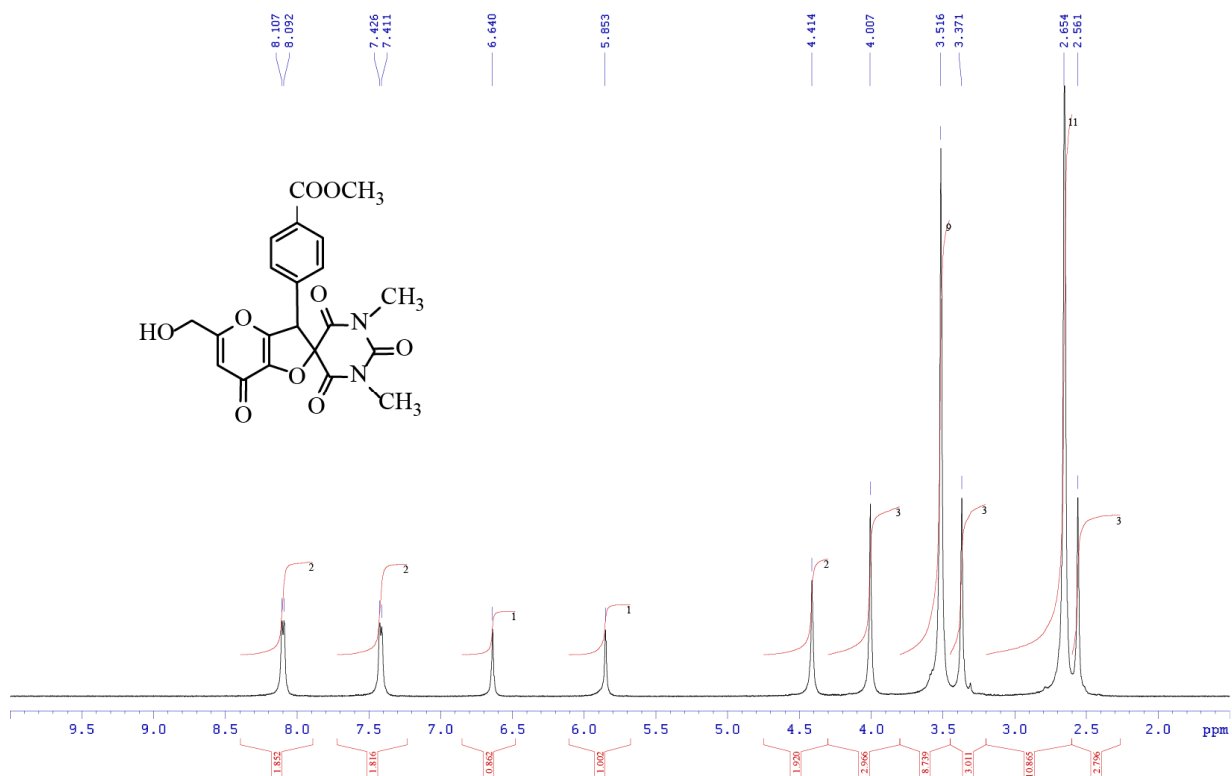

**Figure S17. Compound 2i.**

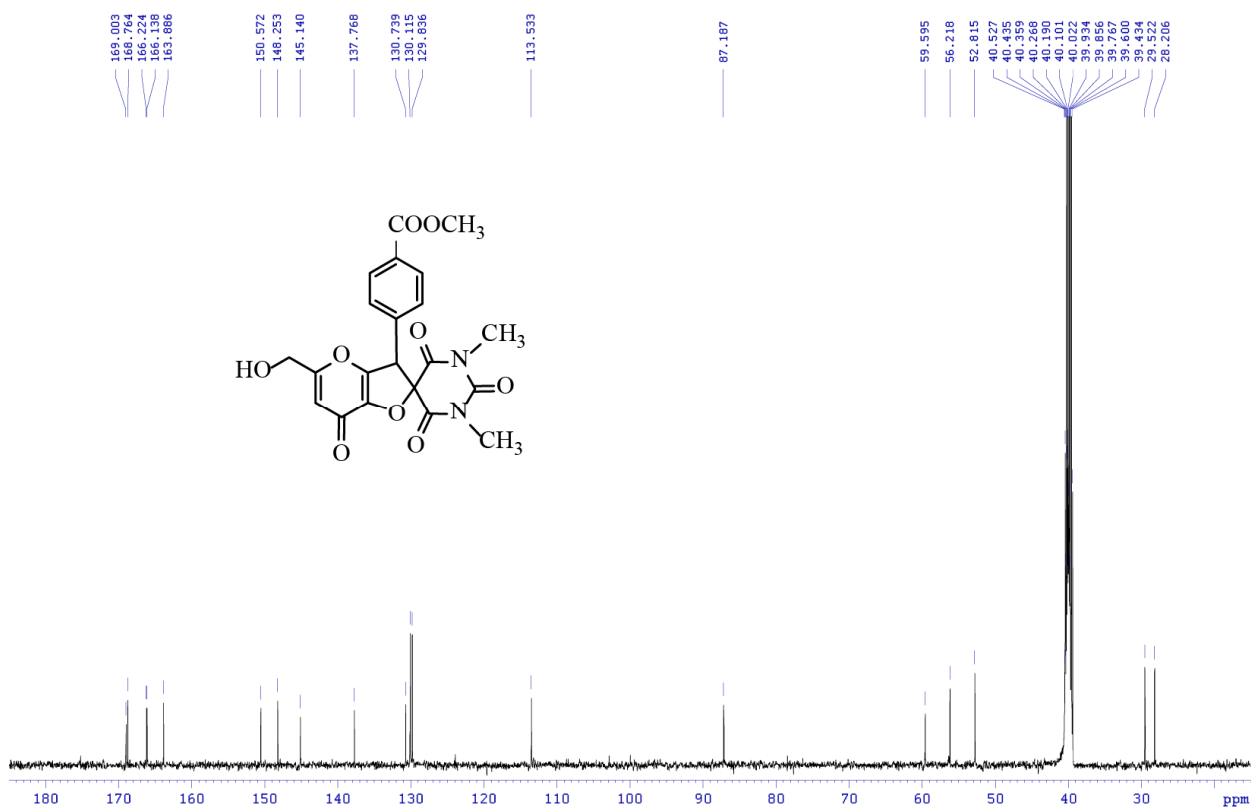

Figure S18. Compound 2i.

## 2. 2D NMR Spectra of Compound 2a

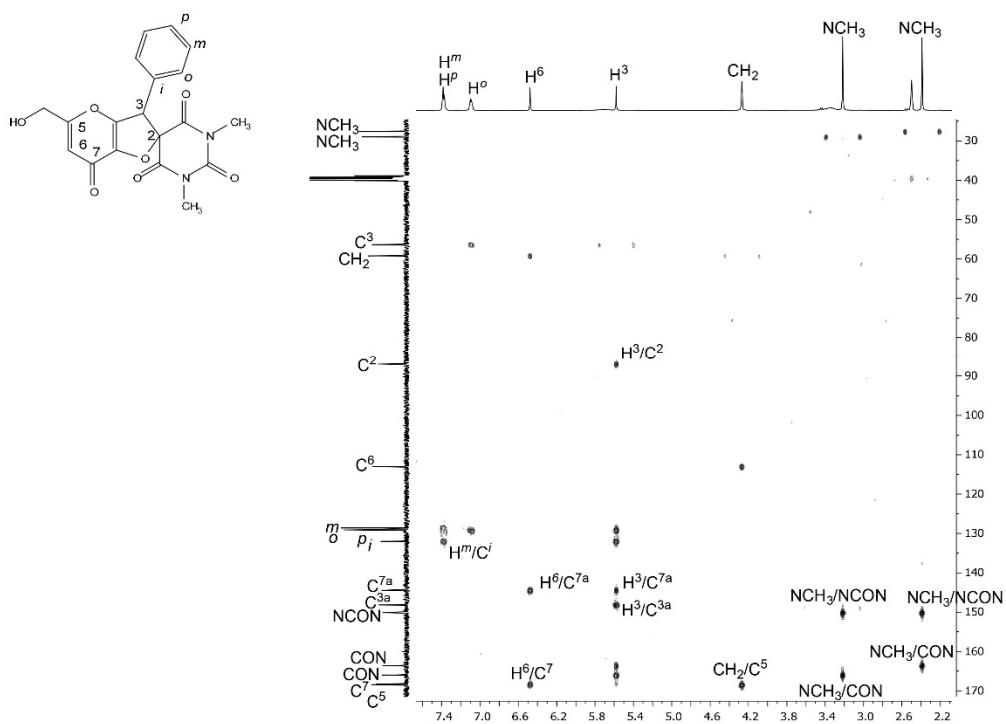

Figure S19. <sup>1</sup>H-<sup>13</sup>C HMBC NMR spectrum of 2a.

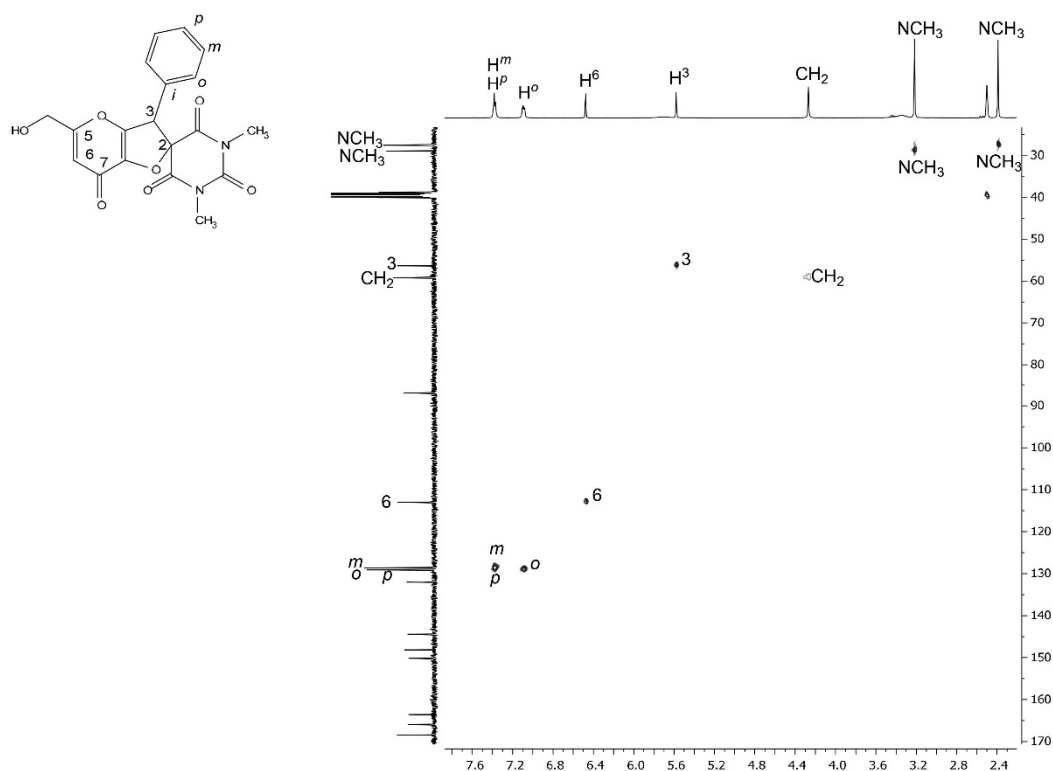

Figure S20.  $^1\text{H}$ - $^{13}\text{C}$  HSQC NMR spectrum of 2a.

## 2. Single-crystal X-ray Diffraction Data for Compound 2f

Table S1. Crystal data and structure refinement for 2f.

|                                 |                                                           |                |
|---------------------------------|-----------------------------------------------------------|----------------|
| Identification code             | <b>2f</b>                                                 |                |
| Empirical formula               | $\text{C}_{19}\text{H}_{15}\text{Cl}\text{N}_2\text{O}_7$ |                |
| Formula weight                  | 418.78                                                    |                |
| Temperature                     | 100(2) K                                                  |                |
| Wavelength                      | 0.71073 Å                                                 |                |
| Crystal system                  | Orthorhombic                                              |                |
| Space group                     | $P2_12_12_1$                                              |                |
| Unit cell dimensions            | $a = 5.68820(10)$ Å                                       | $= 90^\circ$ . |
|                                 | $b = 11.4345(2)$ Å                                        | $= 90^\circ$ . |
|                                 | $c = 27.5456(6)$ Å                                        | $= 90^\circ$ . |
| Volume                          | $1791.61(6)$ Å <sup>3</sup>                               |                |
| Z                               | 4                                                         |                |
| Density (calculated)            | $1.553$ g/cm <sup>3</sup>                                 |                |
| Absorption coefficient          | $0.262$ mm <sup>-1</sup>                                  |                |
| F(000)                          | 864                                                       |                |
| Crystal size                    | $0.170 \times 0.150 \times 0.130$ mm <sup>3</sup>         |                |
| Theta range for data collection | $1.928$ to $28.278^\circ$ .                               |                |

|                                   |                                                             |
|-----------------------------------|-------------------------------------------------------------|
| Index ranges                      | -7<= <i>h</i> <=7, -15<= <i>k</i> <=15, -36<= <i>l</i> <=36 |
| Reflections collected             | 35956                                                       |
| Independent reflections           | 4446 [R(int) = 0.0552]                                      |
| Observed reflections              | 4004                                                        |
| Completeness to theta = 25.242°   | 99.9 %                                                      |
| Absorption correction             | Semi-empirical from equivalents                             |
| Max. and min. transmission        | 0.7431 and 0.7180                                           |
| Refinement method                 | Full-matrix least-squares on F <sup>2</sup>                 |
| Data / restraints / parameters    | 4446 / 0 / 268                                              |
| Goodness-of-fit on F <sup>2</sup> | 1.061                                                       |
| Final R indices [I>2sigma(I)]     | R1 = 0.0339, wR2 = 0.0727                                   |
| R indices (all data)              | R1 = 0.0423, wR2 = 0.0785                                   |
| Absolute structure parameter      | 0.26(3)                                                     |
| Largest diff. peak and hole       | 0.232 and -0.248 e.Å <sup>-3</sup>                          |

**Table S2.** Atomic coordinates (x 10<sup>4</sup>) and equivalent isotropic displacement parameters (Å<sup>2</sup> x 10<sup>3</sup>) for **2f**. U(eq) is defined as one third of the trace of the orthogonalized U<sup>ij</sup> tensor.

|       | x        | y        | z       | U(eq) |
|-------|----------|----------|---------|-------|
| Cl(1) | 7794(1)  | 6058(1)  | 4128(1) | 28(1) |
| O(1)  | 8292(3)  | 7886(1)  | 6502(1) | 16(1) |
| O(2)  | 5515(3)  | 5255(2)  | 6871(1) | 23(1) |
| O(3)  | 10579(3) | 1869(2)  | 6050(1) | 28(1) |
| O(4)  | 4108(3)  | 4177(2)  | 6062(1) | 31(1) |
| O(5)  | 6570(4)  | 10824(2) | 6793(1) | 27(1) |
| O(6)  | 2661(4)  | 7005(2)  | 7364(1) | 32(1) |
| O(7)  | 9535(3)  | 4437(2)  | 7293(1) | 23(1) |
| N(1)  | 7415(4)  | 3077(2)  | 6021(1) | 22(1) |
| N(2)  | 10128(3) | 3143(2)  | 6678(1) | 17(1) |
| C(1)  | 9478(4)  | 2649(2)  | 6236(1) | 19(1) |
| C(2)  | 6086(4)  | 3967(2)  | 6203(1) | 20(1) |
| C(3)  | 7308(4)  | 4740(2)  | 6571(1) | 17(1) |
| C(4)  | 8729(4)  | 5771(2)  | 6307(1) | 15(1) |
| C(5)  | 7623(4)  | 6769(2)  | 6572(1) | 16(1) |
| C(6)  | 6998(4)  | 8724(2)  | 6736(1) | 16(1) |
| C(7)  | 5112(4)  | 8470(2)  | 7012(1) | 18(1) |
| C(8)  | 4354(4)  | 7276(2)  | 7105(1) | 19(1) |
| C(9)  | 5846(4)  | 6445(2)  | 6856(1) | 18(1) |

---

|       |          |         |         |       |
|-------|----------|---------|---------|-------|
| C(10) | 9045(4)  | 4090(2) | 6894(1) | 16(1) |
| C(11) | 6464(6)  | 2431(3) | 5601(1) | 37(1) |
| C(12) | 8450(4)  | 5851(2) | 5759(1) | 15(1) |
| C(13) | 10213(4) | 5417(2) | 5459(1) | 19(1) |
| C(14) | 10004(4) | 5471(2) | 4957(1) | 21(1) |
| C(15) | 8013(4)  | 5963(2) | 4756(1) | 19(1) |
| C(16) | 6232(4)  | 6405(2) | 5045(1) | 20(1) |
| C(17) | 6459(4)  | 6348(2) | 5546(1) | 18(1) |
| C(18) | 8008(4)  | 9907(2) | 6628(1) | 20(1) |
| C(19) | 12056(5) | 2588(2) | 6946(1) | 25(1) |

---

**Table S3.** Bond lengths [Å] and angles [°] for **2f**.

---

|             |          |
|-------------|----------|
| Cl(1)-C(15) | 1.738(2) |
| O(1)-C(5)   | 1.347(3) |
| O(1)-C(6)   | 1.369(3) |
| O(2)-C(9)   | 1.374(3) |
| O(2)-C(3)   | 1.439(3) |
| O(3)-C(1)   | 1.205(3) |
| O(4)-C(2)   | 1.215(3) |
| O(5)-C(18)  | 1.405(3) |
| O(5)-H(5)   | 0.78(3)  |
| O(6)-C(8)   | 1.238(3) |
| O(7)-C(10)  | 1.202(3) |
| N(1)-C(2)   | 1.363(3) |
| N(1)-C(1)   | 1.402(3) |
| N(1)-C(11)  | 1.474(3) |
| N(2)-C(10)  | 1.380(3) |
| N(2)-C(1)   | 1.393(3) |
| N(2)-C(19)  | 1.467(3) |
| C(2)-C(3)   | 1.514(3) |
| C(3)-C(10)  | 1.523(3) |
| C(3)-C(4)   | 1.603(3) |
| C(4)-C(5)   | 1.494(3) |
| C(4)-C(12)  | 1.521(3) |
| C(4)-H(4)   | 1.0000   |
| C(5)-C(9)   | 1.331(3) |
| C(6)-C(7)   | 1.348(3) |
| C(6)-C(18)  | 1.499(3) |

---

|                  |            |
|------------------|------------|
| C(7)-C(8)        | 1.454(3)   |
| C(7)-H(7)        | 0.9500     |
| C(8)-C(9)        | 1.446(3)   |
| C(11)-H(11A)     | 0.9800     |
| C(11)-H(11B)     | 0.9800     |
| C(11)-H(11C)     | 0.9800     |
| C(12)-C(13)      | 1.390(3)   |
| C(12)-C(17)      | 1.396(3)   |
| C(13)-C(14)      | 1.391(3)   |
| C(13)-H(13)      | 0.9500     |
| C(14)-C(15)      | 1.381(3)   |
| C(14)-H(14)      | 0.9500     |
| C(15)-C(16)      | 1.384(3)   |
| C(16)-C(17)      | 1.389(4)   |
| C(16)-H(16)      | 0.9500     |
| C(17)-H(17)      | 0.9500     |
| C(18)-H(18A)     | 0.9900     |
| C(18)-H(18B)     | 0.9900     |
| C(19)-H(19A)     | 0.9800     |
| C(19)-H(19B)     | 0.9800     |
| C(19)-H(19C)     | 0.9800     |
| C(5)-O(1)-C(6)   | 116.36(18) |
| C(9)-O(2)-C(3)   | 106.90(18) |
| C(18)-O(5)-H(5)  | 111(3)     |
| C(2)-N(1)-C(1)   | 124.6(2)   |
| C(2)-N(1)-C(11)  | 117.3(2)   |
| C(1)-N(1)-C(11)  | 117.6(2)   |
| C(10)-N(2)-C(1)  | 125.1(2)   |
| C(10)-N(2)-C(19) | 117.2(2)   |
| C(1)-N(2)-C(19)  | 117.6(2)   |
| O(3)-C(1)-N(2)   | 122.3(2)   |
| O(3)-C(1)-N(1)   | 120.9(2)   |
| N(2)-C(1)-N(1)   | 116.8(2)   |
| O(4)-C(2)-N(1)   | 123.0(2)   |
| O(4)-C(2)-C(3)   | 121.5(2)   |
| N(1)-C(2)-C(3)   | 115.4(2)   |
| O(2)-C(3)-C(2)   | 107.38(19) |
| O(2)-C(3)-C(10)  | 108.85(18) |
| C(2)-C(3)-C(10)  | 113.8(2)   |

---

|                     |            |
|---------------------|------------|
| O(2)-C(3)-C(4)      | 108.50(18) |
| C(2)-C(3)-C(4)      | 110.97(19) |
| C(10)-C(3)-C(4)     | 107.25(18) |
| C(5)-C(4)-C(12)     | 113.29(19) |
| C(5)-C(4)-C(3)      | 97.35(17)  |
| C(12)-C(4)-C(3)     | 116.19(18) |
| C(5)-C(4)-H(4)      | 109.8      |
| C(12)-C(4)-H(4)     | 109.8      |
| C(3)-C(4)-H(4)      | 109.8      |
| C(9)-C(5)-O(1)      | 124.3(2)   |
| C(9)-C(5)-C(4)      | 113.3(2)   |
| O(1)-C(5)-C(4)      | 122.35(19) |
| C(7)-C(6)-O(1)      | 122.9(2)   |
| C(7)-C(6)-C(18)     | 127.6(2)   |
| O(1)-C(6)-C(18)     | 109.46(19) |
| C(6)-C(7)-C(8)      | 122.5(2)   |
| C(6)-C(7)-H(7)      | 118.7      |
| C(8)-C(7)-H(7)      | 118.7      |
| O(6)-C(8)-C(9)      | 124.4(2)   |
| O(6)-C(8)-C(7)      | 124.6(2)   |
| C(9)-C(8)-C(7)      | 111.1(2)   |
| C(5)-C(9)-O(2)      | 113.4(2)   |
| C(5)-C(9)-C(8)      | 122.8(2)   |
| O(2)-C(9)-C(8)      | 123.8(2)   |
| O(7)-C(10)-N(2)     | 123.3(2)   |
| O(7)-C(10)-C(3)     | 121.6(2)   |
| N(2)-C(10)-C(3)     | 114.9(2)   |
| N(1)-C(11)-H(11A)   | 109.5      |
| N(1)-C(11)-H(11B)   | 109.5      |
| H(11A)-C(11)-H(11B) | 109.5      |
| N(1)-C(11)-H(11C)   | 109.5      |
| H(11A)-C(11)-H(11C) | 109.5      |
| H(11B)-C(11)-H(11C) | 109.5      |
| C(13)-C(12)-C(17)   | 118.8(2)   |
| C(13)-C(12)-C(4)    | 119.5(2)   |
| C(17)-C(12)-C(4)    | 121.7(2)   |
| C(12)-C(13)-C(14)   | 120.9(2)   |
| C(12)-C(13)-H(13)   | 119.6      |
| C(14)-C(13)-H(13)   | 119.6      |

---

|                     |            |
|---------------------|------------|
| C(15)-C(14)-C(13)   | 119.2(2)   |
| C(15)-C(14)-H(14)   | 120.4      |
| C(13)-C(14)-H(14)   | 120.4      |
| C(14)-C(15)-C(16)   | 121.2(2)   |
| C(14)-C(15)-Cl(1)   | 118.94(19) |
| C(16)-C(15)-Cl(1)   | 119.84(19) |
| C(15)-C(16)-C(17)   | 119.2(2)   |
| C(15)-C(16)-H(16)   | 120.4      |
| C(17)-C(16)-H(16)   | 120.4      |
| C(16)-C(17)-C(12)   | 120.8(2)   |
| C(16)-C(17)-H(17)   | 119.6      |
| C(12)-C(17)-H(17)   | 119.6      |
| O(5)-C(18)-C(6)     | 112.79(19) |
| O(5)-C(18)-H(18A)   | 109.0      |
| C(6)-C(18)-H(18A)   | 109.0      |
| O(5)-C(18)-H(18B)   | 109.0      |
| C(6)-C(18)-H(18B)   | 109.0      |
| H(18A)-C(18)-H(18B) | 107.8      |
| N(2)-C(19)-H(19A)   | 109.5      |
| N(2)-C(19)-H(19B)   | 109.5      |
| H(19A)-C(19)-H(19B) | 109.5      |
| N(2)-C(19)-H(19C)   | 109.5      |
| H(19A)-C(19)-H(19C) | 109.5      |
| H(19B)-C(19)-H(19C) | 109.5      |

---

Symmetry transformations used to generate equivalent atoms:

**Table S4.** Anisotropic displacement parameters ( $\text{\AA}^2 \times 10^3$ ) for **2f**. The anisotropic displacement factor exponent takes the form:  $-2 \sum h^2 a^{*2} U^{11} + \dots + 2 h k a^* b^* U^{12}$ .

|       | U <sup>11</sup> | U <sup>22</sup> | U <sup>33</sup> | U <sup>23</sup> | U <sup>13</sup> | U <sup>12</sup> |
|-------|-----------------|-----------------|-----------------|-----------------|-----------------|-----------------|
| Cl(1) | 29(1)           | 36(1)           | 18(1)           | 0(1)            | -4(1)           | -6(1)           |
| O(1)  | 20(1)           | 12(1)           | 18(1)           | 0(1)            | 5(1)            | -2(1)           |
| O(2)  | 19(1)           | 14(1)           | 34(1)           | 4(1)            | 12(1)           | 1(1)            |
| O(3)  | 32(1)           | 19(1)           | 34(1)           | -3(1)           | 10(1)           | -1(1)           |
| O(4)  | 20(1)           | 31(1)           | 42(1)           | 16(1)           | -12(1)          | -6(1)           |
| O(5)  | 33(1)           | 17(1)           | 32(1)           | -3(1)           | 8(1)            | 4(1)            |
| O(6)  | 28(1)           | 22(1)           | 44(1)           | 11(1)           | 19(1)           | 6(1)            |



---

|       |       |       |       |        |        |        |
|-------|-------|-------|-------|--------|--------|--------|
| O(7)  | 28(1) | 23(1) | 17(1) | 1(1)   | 1(1)   | -3(1)  |
| N(1)  | 27(1) | 18(1) | 21(1) | 0(1)   | -4(1)  | -4(1)  |
| N(2)  | 15(1) | 18(1) | 19(1) | 3(1)   | -1(1)  | 2(1)   |
| C(1)  | 22(1) | 14(1) | 21(1) | 3(1)   | 3(1)   | -3(1)  |
| C(2)  | 19(1) | 16(1) | 25(1) | 7(1)   | -3(1)  | -6(1)  |
| C(3)  | 16(1) | 14(1) | 21(1) | 2(1)   | 3(1)   | 0(1)   |
| C(4)  | 13(1) | 13(1) | 18(1) | 1(1)   | 1(1)   | 0(1)   |
| C(5)  | 16(1) | 15(1) | 17(1) | 2(1)   | 0(1)   | 0(1)   |
| C(6)  | 19(1) | 14(1) | 15(1) | -1(1)  | -1(1)  | 3(1)   |
| C(7)  | 20(1) | 16(1) | 18(1) | 2(1)   | 3(1)   | 4(1)   |
| C(8)  | 18(1) | 20(1) | 21(1) | 4(1)   | 5(1)   | 3(1)   |
| C(9)  | 17(1) | 14(1) | 22(1) | 3(1)   | 2(1)   | 1(1)   |
| C(10) | 16(1) | 15(1) | 18(1) | 3(1)   | 1(1)   | -3(1)  |
| C(11) | 46(2) | 35(2) | 30(2) | -11(1) | -11(1) | -12(1) |
| C(12) | 15(1) | 11(1) | 18(1) | 1(1)   | 0(1)   | 0(1)   |
| C(13) | 15(1) | 19(1) | 24(1) | 1(1)   | -1(1)  | 2(1)   |
| C(14) | 20(1) | 22(1) | 22(1) | -3(1)  | 3(1)   | 2(1)   |
| C(15) | 21(1) | 19(1) | 18(1) | -1(1)  | -2(1)  | -4(1)  |
| C(16) | 14(1) | 20(1) | 25(1) | 2(1)   | -3(1)  | 1(1)   |
| C(17) | 14(1) | 17(1) | 25(1) | 0(1)   | 2(1)   | 2(1)   |
| C(18) | 22(1) | 15(1) | 21(1) | -1(1)  | 4(1)   | 0(1)   |
| C(19) | 18(1) | 28(1) | 28(1) | 8(1)   | -2(1)  | 4(1)   |

---

---

**Table S5.** Hydrogen coordinates ( $\times 10^4$ ) and isotropic displacement parameters ( $\text{\AA}^2 \times 10^3$ ) for **2f**.

|        | x        | y         | z        | U(eq)  |
|--------|----------|-----------|----------|--------|
| H(5)   | 6860(60) | 10990(30) | 7059(13) | 39(10) |
| H(4)   | 10434    | 5719      | 6393     | 18     |
| H(7)   | 4243     | 9095      | 7152     | 22     |
| H(11A) | 5195     | 1914      | 5709     | 56     |
| H(11B) | 7717     | 1963      | 5453     | 56     |
| H(11C) | 5850     | 2987      | 5362     | 56     |
| H(13)  | 11579    | 5079      | 5600     | 23     |
| H(14)  | 11217    | 5173      | 4755     | 25     |
| H(16)  | 4873     | 6743      | 4902     | 24     |
| H(17)  | 5244     | 6650      | 5747     | 22     |
| H(18A) | 9570     | 9972      | 6785     | 23     |
| H(18B) | 8234     | 9986      | 6274     | 23     |
| H(19A) | 13133    | 3190      | 7067     | 37     |
| H(19B) | 12909    | 2055      | 6731     | 37     |
| H(19C) | 11413    | 2147      | 7221     | 37     |

---

---

**Table S6.** Torsion angles [°] for **2f**.

---

|                       |            |
|-----------------------|------------|
| C(10)-N(2)-C(1)-O(3)  | 175.2(2)   |
| C(19)-N(2)-C(1)-O(3)  | -7.4(3)    |
| C(10)-N(2)-C(1)-N(1)  | -6.9(3)    |
| C(19)-N(2)-C(1)-N(1)  | 170.5(2)   |
| C(2)-N(1)-C(1)-O(3)   | -179.0(2)  |
| C(11)-N(1)-C(1)-O(3)  | 8.6(4)     |
| C(2)-N(1)-C(1)-N(2)   | 3.1(3)     |
| C(11)-N(1)-C(1)-N(2)  | -169.3(2)  |
| C(1)-N(1)-C(2)-O(4)   | -166.1(2)  |
| C(11)-N(1)-C(2)-O(4)  | 6.4(4)     |
| C(1)-N(1)-C(2)-C(3)   | 18.2(3)    |
| C(11)-N(1)-C(2)-C(3)  | -169.4(2)  |
| C(9)-O(2)-C(3)-C(2)   | -125.8(2)  |
| C(9)-O(2)-C(3)-C(10)  | 110.6(2)   |
| C(9)-O(2)-C(3)-C(4)   | -5.8(2)    |
| O(4)-C(2)-C(3)-O(2)   | 29.2(3)    |
| N(1)-C(2)-C(3)-O(2)   | -155.0(2)  |
| O(4)-C(2)-C(3)-C(10)  | 149.7(2)   |
| N(1)-C(2)-C(3)-C(10)  | -34.5(3)   |
| O(4)-C(2)-C(3)-C(4)   | -89.3(3)   |
| N(1)-C(2)-C(3)-C(4)   | 86.6(2)    |
| O(2)-C(3)-C(4)-C(5)   | 7.5(2)     |
| C(2)-C(3)-C(4)-C(5)   | 125.3(2)   |
| C(10)-C(3)-C(4)-C(5)  | -109.9(2)  |
| O(2)-C(3)-C(4)-C(12)  | -113.0(2)  |
| C(2)-C(3)-C(4)-C(12)  | 4.7(3)     |
| C(10)-C(3)-C(4)-C(12) | 129.6(2)   |
| C(6)-O(1)-C(5)-C(9)   | -1.2(3)    |
| C(6)-O(1)-C(5)-C(4)   | 174.5(2)   |
| C(12)-C(4)-C(5)-C(9)  | 115.6(2)   |
| C(3)-C(4)-C(5)-C(9)   | -7.0(2)    |
| C(12)-C(4)-C(5)-O(1)  | -60.5(3)   |
| C(3)-C(4)-C(5)-O(1)   | 176.8(2)   |
| C(5)-O(1)-C(6)-C(7)   | -1.8(3)    |
| C(5)-O(1)-C(6)-C(18)  | 178.63(19) |
| O(1)-C(6)-C(7)-C(8)   | 3.1(4)     |
| C(18)-C(6)-C(7)-C(8)  | -177.5(2)  |

---

|                         |             |
|-------------------------|-------------|
| C(6)-C(7)-C(8)-O(6)     | 178.5(2)    |
| C(6)-C(7)-C(8)-C(9)     | -1.2(3)     |
| O(1)-C(5)-C(9)-O(2)     | -179.7(2)   |
| C(4)-C(5)-C(9)-O(2)     | 4.3(3)      |
| O(1)-C(5)-C(9)-C(8)     | 3.0(4)      |
| C(4)-C(5)-C(9)-C(8)     | -173.0(2)   |
| C(3)-O(2)-C(9)-C(5)     | 1.3(3)      |
| C(3)-O(2)-C(9)-C(8)     | 178.5(2)    |
| O(6)-C(8)-C(9)-C(5)     | 178.6(3)    |
| C(7)-C(8)-C(9)-C(5)     | -1.7(3)     |
| O(6)-C(8)-C(9)-O(2)     | 1.5(4)      |
| C(7)-C(8)-C(9)-O(2)     | -178.7(2)   |
| C(1)-N(2)-C(10)-O(7)    | 174.0(2)    |
| C(19)-N(2)-C(10)-O(7)   | -3.4(3)     |
| C(1)-N(2)-C(10)-C(3)    | -11.0(3)    |
| C(19)-N(2)-C(10)-C(3)   | 171.5(2)    |
| O(2)-C(3)-C(10)-O(7)    | -34.3(3)    |
| C(2)-C(3)-C(10)-O(7)    | -154.0(2)   |
| C(4)-C(3)-C(10)-O(7)    | 82.9(3)     |
| O(2)-C(3)-C(10)-N(2)    | 150.71(19)  |
| C(2)-C(3)-C(10)-N(2)    | 31.0(3)     |
| C(4)-C(3)-C(10)-N(2)    | -92.1(2)    |
| C(5)-C(4)-C(12)-C(13)   | 147.2(2)    |
| C(3)-C(4)-C(12)-C(13)   | -101.3(2)   |
| C(5)-C(4)-C(12)-C(17)   | -33.0(3)    |
| C(3)-C(4)-C(12)-C(17)   | 78.5(3)     |
| C(17)-C(12)-C(13)-C(14) | -0.2(4)     |
| C(4)-C(12)-C(13)-C(14)  | 179.6(2)    |
| C(12)-C(13)-C(14)-C(15) | 0.0(4)      |
| C(13)-C(14)-C(15)-C(16) | 0.2(4)      |
| C(13)-C(14)-C(15)-Cl(1) | 178.55(19)  |
| C(14)-C(15)-C(16)-C(17) | -0.2(4)     |
| Cl(1)-C(15)-C(16)-C(17) | -178.49(19) |
| C(15)-C(16)-C(17)-C(12) | -0.1(4)     |
| C(13)-C(12)-C(17)-C(16) | 0.2(4)      |
| C(4)-C(12)-C(17)-C(16)  | -179.6(2)   |
| C(7)-C(6)-C(18)-O(5)    | -8.8(4)     |
| O(1)-C(6)-C(18)-O(5)    | 170.7(2)    |

---

Symmetry transformations used to generate equivalent atoms:

**Table S7.** Hydrogen bonds for **2f** [Å and °].

| D-H...A            | d(D-H)  | d(H...A) | d(D...A) | <(DHA) |
|--------------------|---------|----------|----------|--------|
| O(5)-H(5)...O(6)#1 | 0.78(3) | 1.99(4)  | 2.722(3) | 158(3) |

Symmetry transformations used to generate equivalent atoms:

#1 -x+1,y+1/2,-z+3/2
